# Supplementary material for: pH-Dependent selective extraction of gold(iii) from synthetic solution and computer motherboard leachate using a hybrid nanocomposite
Source: Royal Society of Chemistry journal article supplement (doi:10.1039/d4ra04476b), 2024-01-01
Supplement: d4ra04476b1.pdf [file d4ra04476b1.pdf]

**pH-dependent selective extraction of gold (III) from synthetic solution and  
computer motherboard leachate using a hybrid nanocomposite**

**Rabeea D. Abdel-Rahim, Mahmoud Thabet, Ahmed R. Abdellah, Mohamed O. Saleh,  
Ahmed M. M. Fadi, Adham M. Nagiub, Hassanien Gomaa\***

Department of Chemistry, Faculty of Science, Al-Azhar University, Assiut 71524, Egypt.

\* Corresponding author: H. Gomaa ([h.gomaa@azhar.edu.eg](mailto:h.gomaa@azhar.edu.eg))

## Chemicals

The consumed substances were high quality, so we used them as obtained without any additional purification. Hydrontetrachlorogold ( $\text{HAuCl}_4$ ), Cobalt(II) acetate ( $\text{Co}(\text{C}_2\text{H}_3\text{O}_2)_2 \cdot 4\text{H}_2\text{O}$ ), and nickel(II) acetate tetrahydrate ( $\text{Ni}(\text{C}_2\text{H}_3\text{O}_2)_2 \cdot 4\text{H}_2\text{O}$ ) were obtained from Innochem (Beijing) Technology Co., Ltd. Urea, thiourea, and polyvinylpyrrolidone (PVP, M wt. 55K) were attained from Shanghai Aladdin Bio-Chem Technology Co., Ltd.

## Characterization Tools

The structural and compositional attributes of  $\text{g-C}_3\text{N}_4$  and  $\text{CoNi}_2\text{S}_4@\text{g-C}_3\text{N}_4$  were systematically characterized through a suite of analytical techniques. Scanning electron microscopy (SEM) investigations, conducted with a GAIA3 Tescan instrument at an electron acceleration voltage of 20 kV, were complemented by energy-dispersive X-ray spectroscopy (EDS) to elucidate the surface morphology and elemental composition. High-resolution transmission electron microscopy (HRTEM) was performed on a JEM-2100F microscope at 200 kV to provide detailed insights into the nanostructures of the materials. X-ray photoelectron spectroscopy (XPS) analyses were carried out using an ESCALAB 250XI instrument with an aluminum K-alpha X-ray source, set at 12 mA and 14.5 kV, to probe the surface chemical states and elemental composition. The crystalline phases of the samples were determined by X-ray diffraction (XRD) using a Rigaku SmartLab diffractometer, employing copper K-alpha radiation at a wavelength of 0.15406 nm, with the system operating at 40 kV and 150 mA. The porosity, including pore size distribution and specific surface area, was quantified through nitrogen adsorption-desorption isotherm measurements using a NOVA 2200e analyzer. Lastly, the surface charge characteristics of the materials were assessed using a Zetasizer Nano ZS (Model: ZEN 3600, Malvern, UK) to measure the zeta potential.

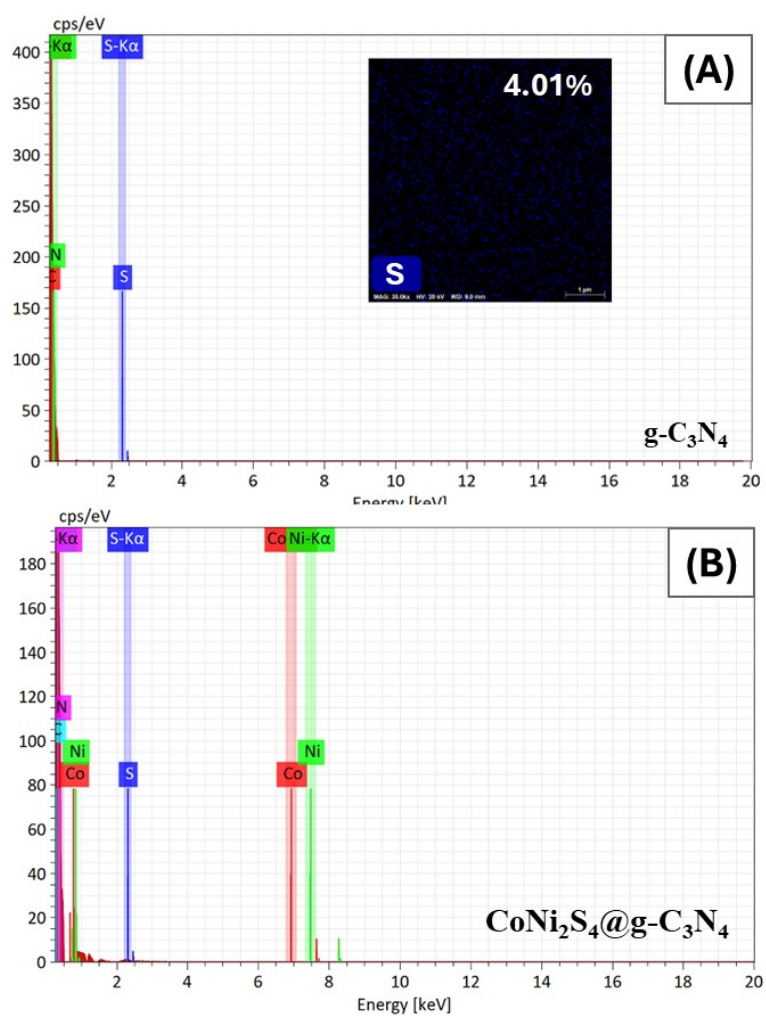

**Figure S1.** EDX patterns of g-C<sub>3</sub>N<sub>4</sub> (A) and CoNi<sub>2</sub>S<sub>4</sub>@g-C<sub>3</sub>N<sub>4</sub> (B) adsorbents.

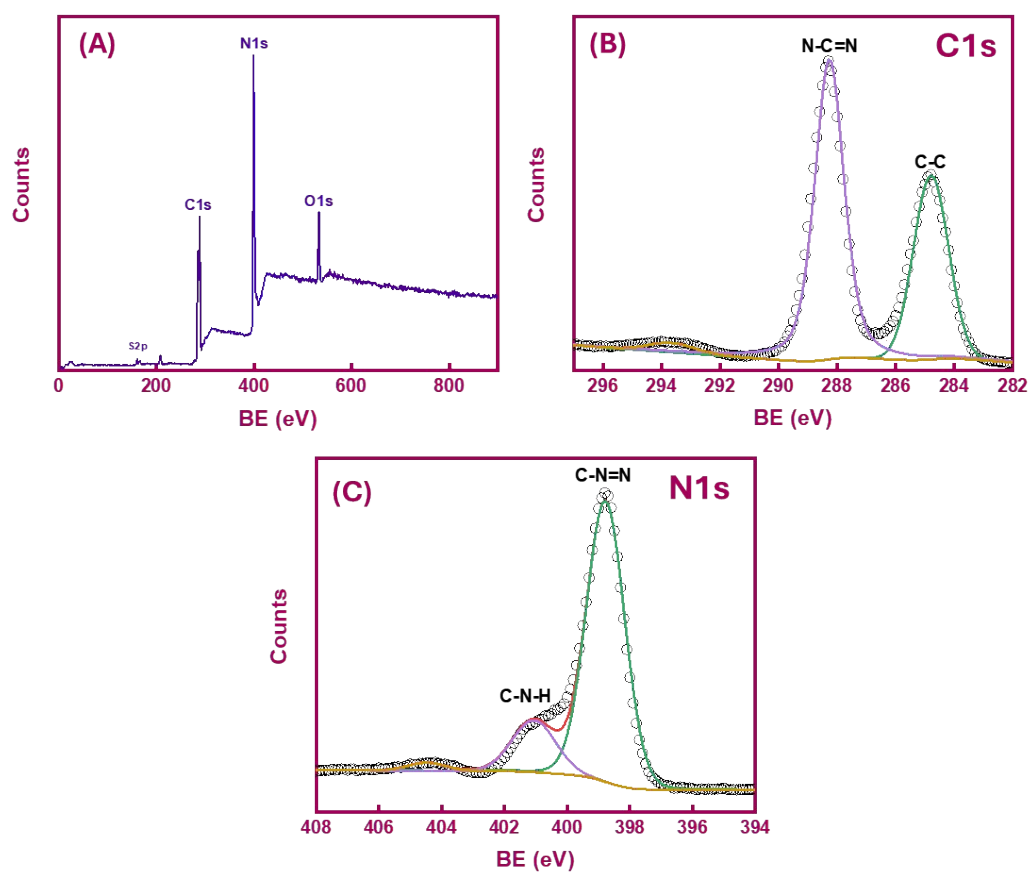

**Figure S2.** XPS survey (A) and spectra of C1s (B), and N1s (C) of g-C<sub>3</sub>N<sub>4</sub> sample.

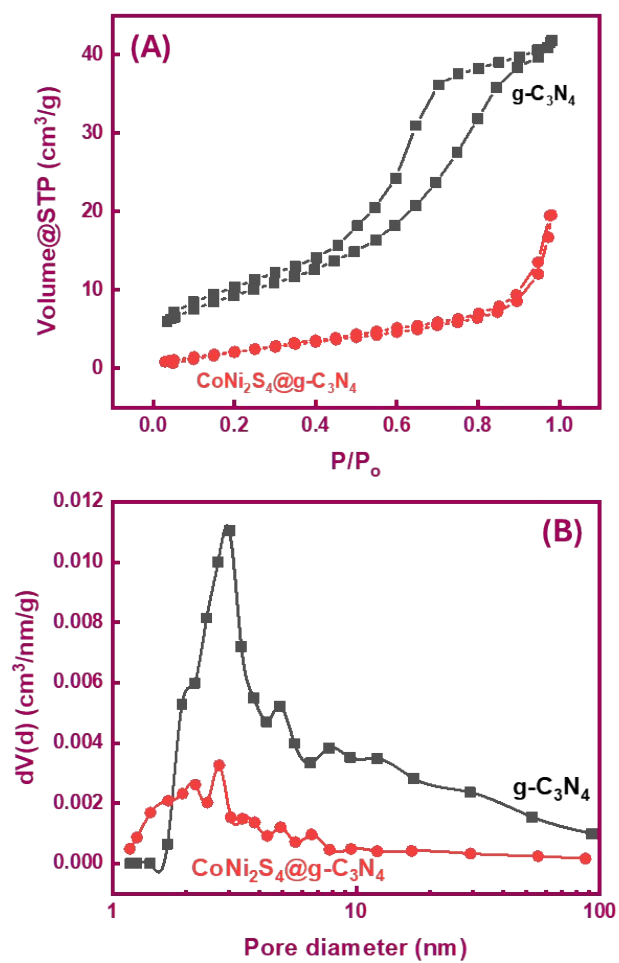

**Figure S3.**  $N_2$ -adsorption-desorption analysis (A) and BJH (B) of mesoporous  $g-C_3N_4$  and  $CoNi_2S_4@g-C_3N_4$  adsorbents.

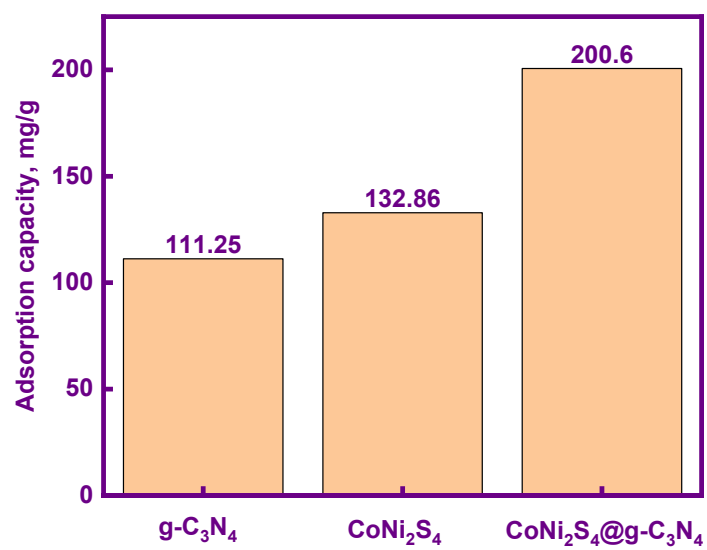

Figure S4. Au(III)-adsorption capacity of g-C<sub>3</sub>N<sub>4</sub> CoNi<sub>2</sub>S<sub>4</sub>, and CoNi<sub>2</sub>S<sub>4</sub>@g-C<sub>3</sub>N<sub>4</sub> nanocomposite at optimal adsorption conditions.
